# Supplementary material
Source: PubMed Central journal article supplement (PMC3711338)

Supplementary Fig. 1 Intracellular application of charged MTS reagents affected  $NP_o$  of wildtype but not cysless CFTR channels. A. Both 100  $\mu$ M MTSET<sup>+</sup> (ET<sup>+</sup>) and MTSEA<sup>+</sup> (EA<sup>+</sup>) increased  $NP_o$  of WT-CFTR. 100  $\mu$ M MTSES<sup>-</sup> (ES<sup>-</sup>) decreased  $NP_o$  of WT-CFTR. -ET<sup>+</sup>, EA<sup>+</sup>, ES<sup>-</sup>: ATP+PKA alone; +ET<sup>+</sup>, EA<sup>+</sup>, ES<sup>-</sup>: ATP+PKA+MTS reagents; Washout: wash out ATP+PKA+MTS reagents with control solution, then wash on ATP+PKA alone. B. Recorded in the same condition as A, the three charged MTS reagents had no effects on  $NP_o$  of cysless-V510A-CFTR.

Supplementary Fig. 2 MTSES<sup>-</sup> failed to rescue R352C-CFTR (A) and MTSET<sup>+</sup> failed to rescue the stable open state in R352A-CFTR (B). A. R352C-CFTR maintained multiple open states in the absence of MTSES<sup>-</sup> (*upper trace*, solution containing ATP + PKA alone) and in the presence of 100  $\mu$ M MTSES<sup>-</sup> (*lower trace*, solution containing ATP + PKA + MTSES<sup>-</sup>), recorded from the same patch. Bath and pipette solutions contained 150 mM Cl<sup>-</sup>, and membrane potential was held at  $V_M = -100$  mV (n=3). B. R352A-CFTR exhibited multiple open states in the absence of MTSET<sup>+</sup> (*upper trace*, solution containing ATP + PKA alone) and in the presence of 100  $\mu$ M MTSET<sup>+</sup> (*lower trace*, solution containing ATP + PKA + MTSET<sup>+</sup>), recorded from the same patch (n=5).

Supplementary Fig. 3 Deposition of negative charge at D993C improved stability of the open state. D993C-CFTR was modified by 100  $\mu$ M MTSES<sup>-</sup> (A) but not by 100  $\mu$ M MTSEA<sup>+</sup> (C). All traces were recorded in the presence of Mg-ATP and PKA from excised inside-out patches with symmetrical 150 mM Cl<sup>-</sup> solution at  $V_M = -100$  mV. B. Comparison of single channel amplitudes of the f open state of D993C-CFTR and mean burst duration of D993C-CFTR in the absence (-MTSES) and presence of 100  $\mu$ M MTSES<sup>-</sup> (+MTSES) condition. Single channel amplitude was

significantly decreased while mean burst duration was significantly increased with MTSES<sup>-</sup> compared to the pre-MTSES<sup>-</sup> condition ( $n=5$ ).

Supplementary Fig. 4 Charge recovery at R352C and D993C on the cysless background repaired channel behavior. R352C-cysless-V510A-CFTR (A) and D993C-cysless-V510A-CFTR (B) in the absence (-MTSEA or -MTSES, with ATP+PKA) and in the presence of 100  $\mu$ M MTS reagents (+MTSEA or +MTSES, with ATP+PKA+MTSEA<sup>+</sup> or MTSES<sup>-</sup>) in excised inside-out patches with similar conditions as Fig. S2 ( $n=3$  each).

**Supplementary Fig. 5** Energetic mutant cycle analysis supports the interaction between R352 and D993 of CFTR. For each single mutation, such as R352C and D993C, the change in free energy relative to that of the wild-type is expressed by the equation:  $\Delta G = -RT \ln(\theta_{\text{mutant}}/\theta_{\text{ww}})$ , where  $\theta$  is the equilibrium gating ratio (see Methods).  $\Delta\Delta G_{\text{int}}$  is calculated as described in Methods.  $\Delta\Delta G_{\text{int}} = -1.508 \text{ kcal.mol}^{-1}$ .

Supplementary Fig. 1

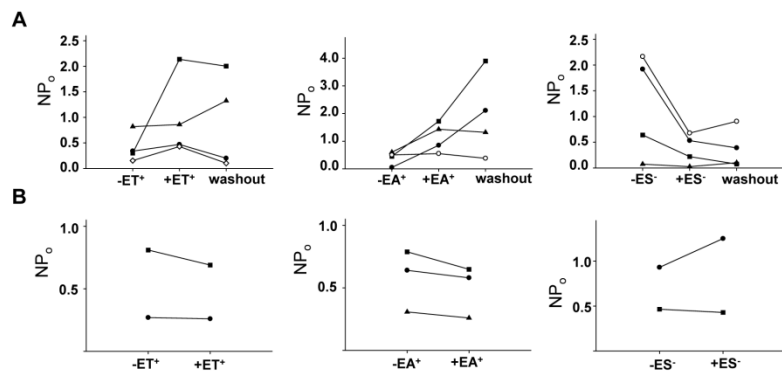

Supplementary Fig. 2

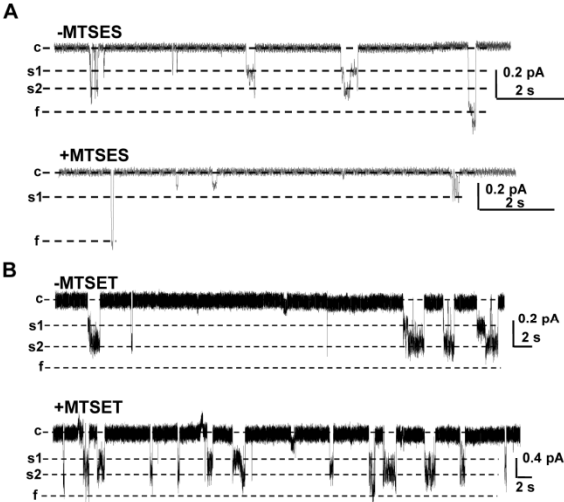

Supplementary Fig. 3

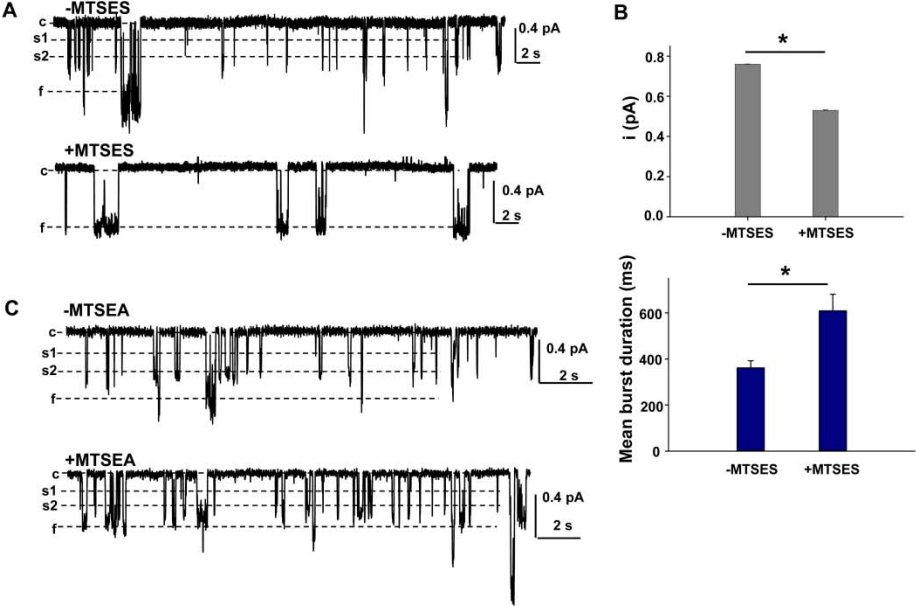

Supplementary Fig. 4

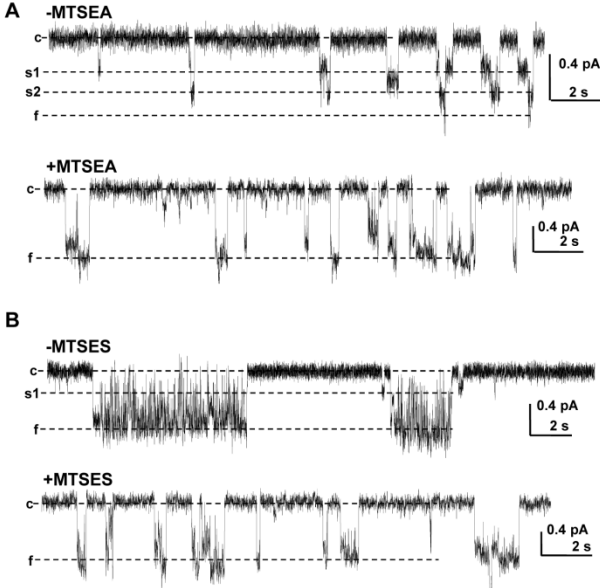

Supplementary Fig. 5

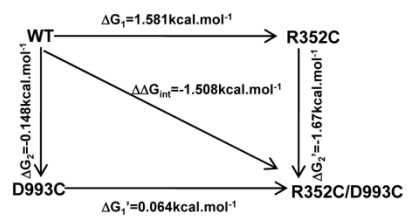

Supplement: supp_M113.476226_jbc.M113.476226-1.pdf [file supp_M113.476226_jbc.M113.476226-1.pdf]
